# Supplementary material for: Contraceptive uptake in post abortion care—Secondary outcomes from a randomised controlled trial, Kisumu, Kenya
Source: PubMed Central journal article supplement (PMC6086397; doi:10.1371/journal.pone.0201214), 2018-08-10
Supplement: pone.0201214.s001.pdf [file pone.0201214.s001.pdf]

**Binary Logistic Regression: Predictors of starting a contraceptive method among women (n=792) obtaining post abortion care.**

**Notes**

|                        |                                |                                                                                                                                                                                                                                                                                                         |                      |
|------------------------|--------------------------------|---------------------------------------------------------------------------------------------------------------------------------------------------------------------------------------------------------------------------------------------------------------------------------------------------------|----------------------|
| Output Created         |                                |                                                                                                                                                                                                                                                                                                         | 05-DEC-2017 14:36:45 |
| Comments               |                                |                                                                                                                                                                                                                                                                                                         |                      |
| Input                  | Data                           | \\fohm\public\home_osd\marlene.makenzius\Documents\KENYA<br>POSTDOC\Contraceptives\REVISED SUBM 2\DATAsharing Plosone.sav                                                                                                                                                                               |                      |
|                        | Active Dataset                 | DataSet1                                                                                                                                                                                                                                                                                                |                      |
|                        | Filter                         | <none>                                                                                                                                                                                                                                                                                                  |                      |
|                        | Weight                         | <none>                                                                                                                                                                                                                                                                                                  |                      |
|                        | Split File                     | <none>                                                                                                                                                                                                                                                                                                  |                      |
|                        | N of Rows in Working Data File |                                                                                                                                                                                                                                                                                                         | 810                  |
| Missing Value Handling | Definition of Missing          | User-defined missing values are treated as missing                                                                                                                                                                                                                                                      |                      |
| Syntax                 |                                | LOGISTIC REGRESSION VARIABLES ACCEPTCONTR<br>/METHOD=ENTER AGE5 Status2 Preg3 Q3.9<br>/CONTRAST (AGE5)=Indicator<br>/CONTRAST (Status2)=Indicator<br>/CONTRAST (Preg3)=Indicator(1)<br>/CONTRAST (Q3.9)=Indicator<br>/PRINT=GOODFIT CORR CI(95)<br>/CRITERIA=PIN(0.05) POUT(0.10) ITERATE(20) CUT(0.5). |                      |
| Resources              | Processor Time                 |                                                                                                                                                                                                                                                                                                         | 00:00:00,05          |
|                        | Elapsed Time                   |                                                                                                                                                                                                                                                                                                         | 00:00:00,04          |

**Case Processing Summary**

| Unweighted Cases <sup>a</sup> |                      | N   | Percent |
|-------------------------------|----------------------|-----|---------|
| Selected Cases                | Included in Analysis | 784 | 96,8    |
|                               | Missing Cases        | 26  | 3,2     |
|                               | Total                | 810 | 100,0   |
| Unselected Cases              |                      | 0   | ,0      |
| Total                         |                      | 810 | 100,0   |

a. If weight is in effect, see classification table for the total number of cases.

**Dependent Variable Encoding**

| Original Value | Internal Value |
|----------------|----------------|
| No             | 0              |
| YES            | 1              |

**Categorical Variables Codings**

|                   |                                                     | Frequency | Parameter coding |       |       |       |
|-------------------|-----------------------------------------------------|-----------|------------------|-------|-------|-------|
|                   |                                                     |           | (1)              | (2)   | (3)   | (4)   |
| AGE5              | -20                                                 | 168       | 1,000            | ,000  | ,000  | ,000  |
|                   | 21-25                                               | 293       | ,000             | 1,000 | ,000  | ,000  |
|                   | 26-30                                               | 203       | ,000             | ,000  | 1,000 | ,000  |
|                   | 31-35                                               | 74        | ,000             | ,000  | ,000  | 1,000 |
|                   | 36-                                                 | 46        | ,000             | ,000  | ,000  | ,000  |
|                   | 0                                                   | 219       | ,000             | ,000  |       |       |
| Pregnancies 3 cat | 1-2                                                 | 339       | 1,000            | ,000  |       |       |
|                   | 3-12                                                | 226       | ,000             | 1,000 |       |       |
|                   | Did your partner accompanied you to the PAC clinic? |           |                  |       |       |       |
| Status dic        | Yes                                                 | 427       | 1,000            |       |       |       |
|                   | No                                                  | 357       | ,000             |       |       |       |
| Status dic        | Married/co-habiting                                 | 537       | 1,000            |       |       |       |
|                   | Single/widowed/devorced/separated                   | 247       | ,000             |       |       |       |

## Block 0: Beginning Block

Classification Table<sup>a,b</sup>

|        | Observed           | Predicted   |     |                    |       |
|--------|--------------------|-------------|-----|--------------------|-------|
|        |                    | ACCEPTCONTR |     | Percentage Correct |       |
|        |                    | No          | YES |                    |       |
| Step 0 | ACCEPTCONTR        | No          | 0   | 190                | ,0    |
|        |                    | YES         | 0   | 594                | 100,0 |
|        | Overall Percentage |             |     |                    | 75,8  |

a. Constant is included in the model.

b. The cut value is ,500

Variables in the Equation

|        | B        | S.E.  | Wald | df      | Sig. | Exp(B) |       |
|--------|----------|-------|------|---------|------|--------|-------|
| Step 0 | Constant | 1,140 | ,083 | 187,035 | 1    | ,000   | 3,126 |

Variables not in the Equation

|        | Score              | df     | Sig. |      |
|--------|--------------------|--------|------|------|
| Step 0 | Variables          |        |      |      |
|        | AGE5               | 12,773 | 4    | ,012 |
|        | AGE5(1)            | 7,283  | 1    | ,007 |
|        | AGE5(2)            | 2,408  | 1    | ,121 |
|        | AGE5(3)            | 4,538  | 1    | ,033 |
|        | AGE5(4)            | 1,344  | 1    | ,246 |
|        | Status2(1)         | 5,558  | 1    | ,018 |
|        | Preg3              | 8,984  | 2    | ,011 |
|        | Preg3(1)           | 1,449  | 1    | ,229 |
|        | Preg3(2)           | 2,604  | 1    | ,107 |
|        | Q3.9(1)            | 4,364  | 1    | ,037 |
|        | Overall Statistics | 22,859 | 8    | ,004 |

## Block 1: Method = Enter

Omnibus Tests of Model Coefficients

|        | Chi-square | df     | Sig. |      |
|--------|------------|--------|------|------|
| Step 1 | Step       | 22,783 | 8    | ,004 |
|        | Block      | 22,783 | 8    | ,004 |
|        | Model      | 22,783 | 8    | ,004 |

Model Summary

| Step | -2 Log likelihood    | Cox & Snell R Square | Nagelkerke R Square |
|------|----------------------|----------------------|---------------------|
| 1    | 845,529 <sup>a</sup> | ,029                 | ,043                |

a. Estimation terminated at iteration number 4 because parameter estimates changed by less than ,001.

Hosmer and Lemeshow Test

| Step | Chi-square | df | Sig. |
|------|------------|----|------|
| 1    | 6,006      | 8  | ,647 |

**Contingency Table for Hosmer and Lemeshow Test**

|        |    | ACCEPTCONTR = No |          | ACCEPTCONTR = YES |          | Total |
|--------|----|------------------|----------|-------------------|----------|-------|
|        |    | Observed         | Expected | Observed          | Expected |       |
| Step 1 | 1  | 28               | 28,863   | 46                | 45,137   | 74    |
|        | 2  | 27               | 22,061   | 41                | 45,939   | 68    |
|        | 3  | 24               | 22,095   | 49                | 50,905   | 73    |
|        | 4  | 16               | 20,689   | 59                | 54,311   | 75    |
|        | 5  | 17               | 19,323   | 61                | 58,677   | 78    |
|        | 6  | 17               | 18,159   | 61                | 59,841   | 78    |
|        | 7  | 21               | 16,769   | 61                | 65,231   | 82    |
|        | 8  | 12               | 11,473   | 51                | 51,527   | 63    |
|        | 9  | 9                | 11,757   | 59                | 56,243   | 68    |
|        | 10 | 19               | 18,812   | 106               | 106,188  | 125   |

**Classification Table<sup>a</sup>**

|                    | Observed    | Predicted   |     |                    |       |
|--------------------|-------------|-------------|-----|--------------------|-------|
|                    |             | ACCEPTCONTR |     | Percentage Correct |       |
|                    |             | No          | YES |                    |       |
| Step 1             | ACCEPTCONTR | No          | 0   | 190                | ,0    |
|                    |             | YES         | 0   | 594                | 100,0 |
| Overall Percentage |             |             |     |                    | 75,8  |

a. The cut value is ,500

**Variables in the Equation**

|                     | B          | S.E.  | Wald   | df    | Sig. | Exp(B) | 95% C.I. for EXP(B) |       |
|---------------------|------------|-------|--------|-------|------|--------|---------------------|-------|
|                     |            |       |        |       |      |        | Lower               | Upper |
| Step 1 <sup>a</sup> | AGE5       |       | 10,615 | 4     | ,031 |        |                     |       |
|                     | AGE5(1)    | ,455  | ,420   | 1,172 | ,279 | 1,576  | ,692                | 3,590 |
|                     | AGE5(2)    | ,853  | ,391   | 4,757 | ,029 | 2,347  | 1,090               | 5,054 |
|                     | AGE5(3)    | ,798  | ,385   | 4,294 | ,038 | 2,220  | 1,044               | 4,722 |
|                     | AGE5(4)    | ,132  | ,414   | ,102  | ,749 | 1,141  | ,507                | 2,568 |
|                     | Status2(1) | ,145  | ,216   | ,450  | ,503 | 1,156  | ,757                | 1,764 |
|                     | Preg3      |       |        | 6,032 | ,049 |        |                     |       |
|                     | Preg3(1)   | ,394  | ,211   | 3,508 | ,061 | 1,483  | ,982                | 2,241 |
|                     | Preg3(2)   | ,658  | ,279   | 5,568 | ,018 | 1,932  | 1,118               | 3,337 |
|                     | Q3.9(1)    | ,192  | ,184   | 1,083 | ,298 | 1,211  | ,844                | 1,739 |
|                     | Constant   | -,019 | ,426   | ,002  | ,965 | ,981   |                     |       |

a. Variable(s) entered on step 1: AGE5, Status2, Preg3, Q3.9.

**Correlation Matrix**

|        |            | Constant | AGE5(1) | AGE5(2) | AGE5(3) | AGE5(4) | Status2(1) | Preg3(1) | Preg3(2) | Q3.9(1) |
|--------|------------|----------|---------|---------|---------|---------|------------|----------|----------|---------|
| Step 1 | Constant   | 1,000    | -,890   | -,865   | -,757   | -,650   | -,289      | -,300    | -,480    | -,035   |
|        | AGE5(1)    | -,890    | 1,000   | ,845    | ,768    | ,653    | ,216       | ,140     | ,396     | -,075   |
|        | AGE5(2)    | -,865    | ,845    | 1,000   | ,805    | ,690    | ,132       | ,084     | ,359     | -,082   |
|        | AGE5(3)    | -,757    | ,768    | ,805    | 1,000   | ,682    | ,069       | -,003    | ,214     | -,090   |
|        | AGE5(4)    | -,650    | ,653    | ,690    | ,682    | 1,000   | ,044       | ,002     | ,090     | -,020   |
|        | Status2(1) | -,289    | ,216    | ,132    | ,069    | ,044    | 1,000      | -,172    | -,215    | -,363   |
|        | Preg3(1)   | -,300    | ,140    | ,084    | -,003   | ,002    | -,172      | 1,000    | ,553     | -,010   |
|        | Preg3(2)   | -,480    | ,396    | ,359    | ,214    | ,090    | -,215      | ,553     | 1,000    | ,017    |
|        | Q3.9(1)    | -,035    | -,075   | -,082   | -,090   | -,020   | -,363      | -,010    | ,017     | 1,000   |
